# Supplementary material for: Parameter Optimization of Ultrasonic–Microwave Synergistic Extraction of Taxanes from Taxus cuspidata Needles
Source: MDPI journal article supplement (doi:10.3390/molecules28237746), 2023-11-24
Supplement: s1 [file s1]

**Parameter Optimization of Ultrasonic-microwave Synergistic  
Extraction of Taxanes from *Taxus cuspidata* Needles**

Zirui Zhao et al

**Supplementary File**

## Supplementary Figure S1

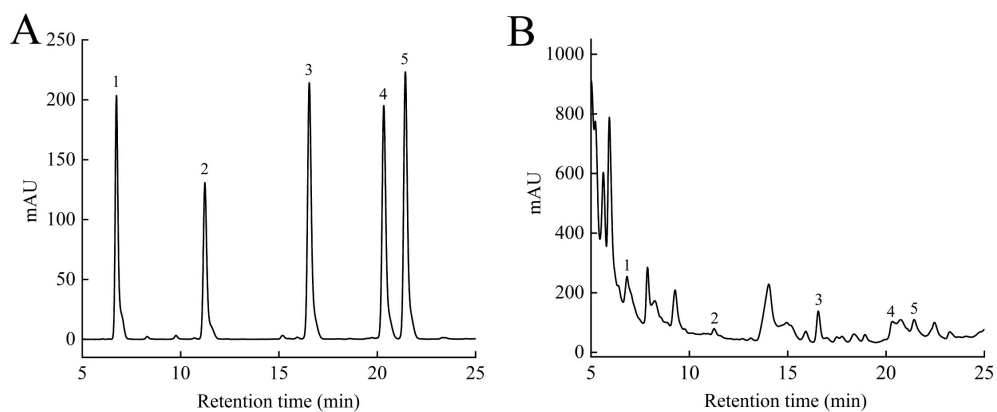

**Figure S1.** High-performance liquid chromatogram of five main taxanes. (A) standard substance, (B) sample after extract. 1, 2, 3, 4, 5 were 10-DAB III, Baccatine III, 10-DAT, Cephalomannine, and Paclitaxel, respectively.

## Supplementary Table S1

**Table S1.** The regression equation and linear range of the five main taxanes.

| Elution order | Compound       | Regression equation         | Correlation coefficient | Linearity range |
|---------------|----------------|-----------------------------|-------------------------|-----------------|
| 1             | 10-DAB III     | $Y = -11853.87X + 23196.98$ | 0.9999                  | 1-100           |
| 2             | Baccatine III  | $Y = -17507.92X + 18122.44$ | 0.9996                  | 1-100           |
| 3             | 10-DAT         | $Y = -15688.62X + 31103.55$ | 0.9999                  | 1-100           |
| 4             | Cephalomannine | $Y = -2962.391X + 26239.53$ | 0.9934                  | 1-100           |
| 5             | Paclitaxel     | $Y = -14899.99X + 32387.80$ | 0.9999                  | 1-100           |
